# Supplementary material for: Enhanced Ca2+Entry and Tyrosine Phosphorylation Mediate Nanostructure‐Induced Endothelial Proliferation
Source: Hindawi journal article supplement (doi:10.1155/2013/251063), 2013-01-01

Figure captions supplement:

Supplement Figure 1: Localization of VE-cadherin in cell-cell junctions of HMEC grown on structured substrates

Confocal microscopy images of HMEC grown on the indicated substrate, fixed 48h after seeding and immunostained with an antibody against VE-cadherin (red). Scale bars represent 10 µm.

Supplement Figure 2: Images of Fig. 3: Activation of focal adhesion kinase (FAK) is observed on flat and ripples but not on wall structures were excessively enhanced in brightness.

Supplement Figure 3: Confocal microscopy images of HMEC grown on the indicated substrate, fixed and immunostained with an antibody against Ki67. Cells were incubated with 50 nm PP2, 3 µm dasatinib (DB), 2 µm imatinib (IB), 10 µm Gd or without inhibitor. Representative images corresponding to the analysis of the mean nuclear immunofluorescence intensity of Fig. 6 are shown.

Suppl. Fig. 1


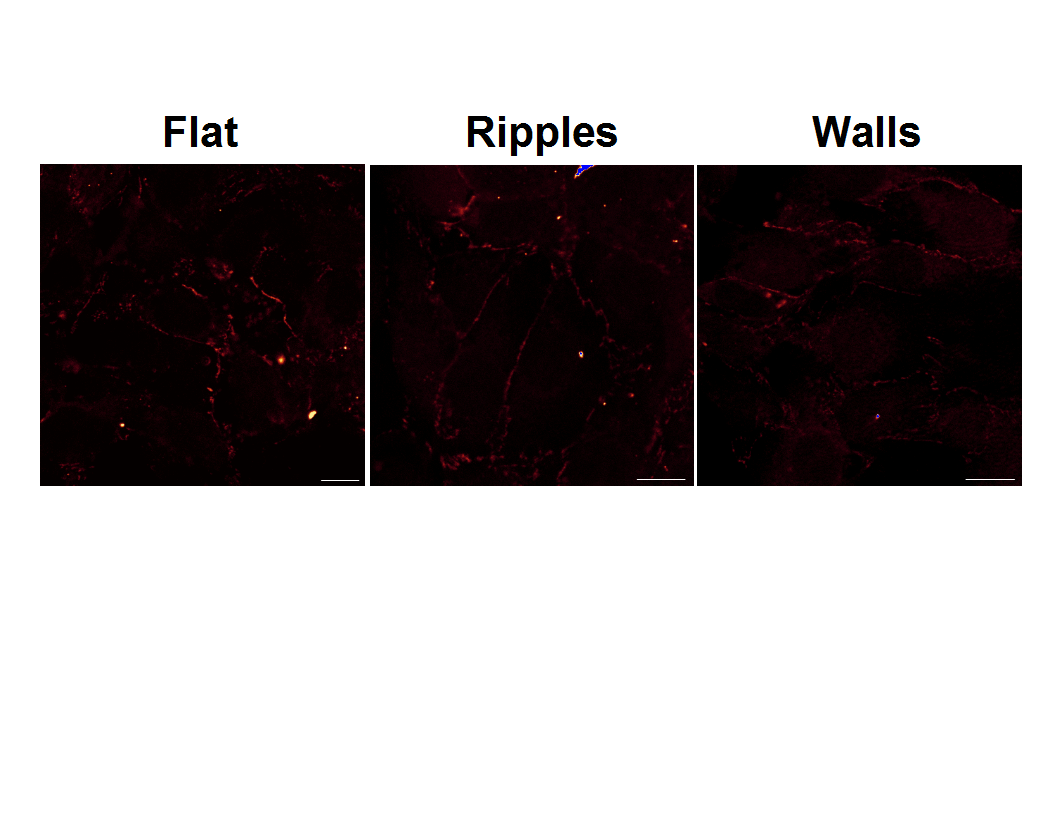


Suppl. Fig. 2


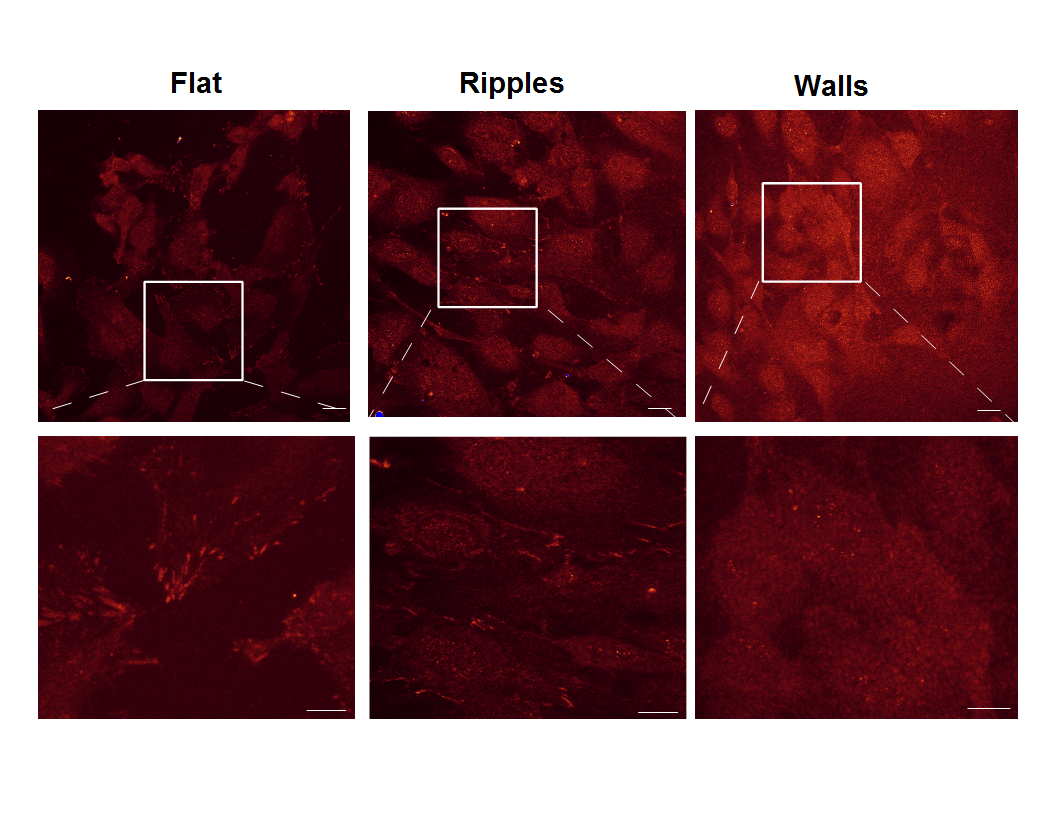


Suppl. Fig. 3


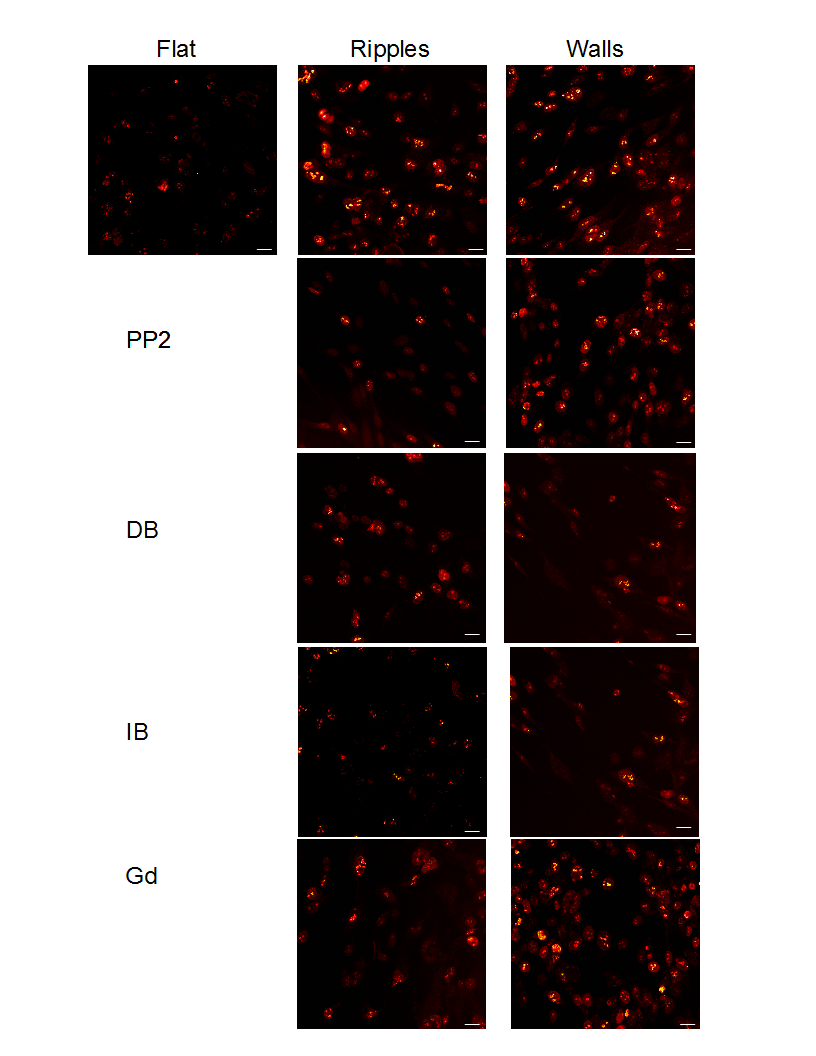

Supplement: f1 [file 251063.f1.doc]
